# Supplementary material
Source: publisher figshare collection journal article supplement (https://diabetesjournals.figshare.com/ndownloader/files/22056351)
Supplement: Supplementary file 1 [file 22056351]

# **Metabolic factors, lifestyle habits, and possible polyneuropathy in early type 2 diabetes: A nationwide study of 5,249 patients in the Danish DD2 cohort**

Authors:

Diana H. Christensen,<sup>1,2</sup> Søren T. Knudsen,<sup>3</sup> Sandra S. Gylfadottir,<sup>2,4,5</sup> Lotte B. Christensen,<sup>1</sup> Jens S. Nielsen,<sup>6</sup> Henning Beck-Nielsen,<sup>6</sup> Henrik T. Sørensen,<sup>1</sup> Henning Andersen,<sup>2,5</sup> Brian C. Callaghan,<sup>2,7</sup> Eva L. Feldman,<sup>2,7</sup> Nanna B. Finnerup,<sup>2,4,5</sup> Troels S. Jensen,<sup>2,4,5</sup> Reimar W. Thomsen,<sup>1</sup>

Author affiliations:

<sup>1</sup>Department of Clinical Epidemiology, Institute of Clinical Medicine, Aarhus University Hospital, Aarhus, Denmark

<sup>2</sup>International Diabetic Neuropathy Consortium, Department of Clinical Medicine, Faculty of Health, Aarhus University, Aarhus, Denmark

<sup>3</sup>Steno Diabetes Center Aarhus (SDCA), Aarhus University Hospital, Aarhus, Denmark

<sup>4</sup>Department of Clinical Medicine, Danish Pain Research Center, Aarhus University, Aarhus, Denmark

<sup>5</sup>Department of Neurology, Aarhus University Hospital, Aarhus, Denmark

<sup>6</sup>Danish Center for Strategic Research in Type 2 Diabetes (DD2), Steno Diabetes Center Odense, Odense, Denmark

<sup>7</sup>Department of Neurology, University of Michigan, Ann Arbor, MI, 48109, USA

Corresponding author:

Diana Christensen, Department of Clinical Epidemiology, Aarhus University Hospital, Olof Palmes Allé 43-45, DK-8200, Aarhus N, Denmark. Tel: +45 8716 8248. Fax: +45 8716 7215. Email: [dhcr@clin.au.dk](mailto:dhcr@clin.au.dk)

## **Supplemental material**

The main focus of this study is the association of metabolic and lifestyle factors measured at baseline around time of type 2 diabetes diagnosis with possible DPN and neuropathic pain at a median of 2.8 years later, as well as the association of changes in some factors from age 20 (BMI) or baseline (smoking and physical activity) to possible DPN/pain assessment median 2.8 years after baseline.

Results for the most important baseline risk factors are presented in the table/figures in the main manuscript.

In this supplementary material, we present results for a few additional baseline risk factors; stratified analyses results; analyses of risk factors measured at the time of questionnaire in 2016; additionally adjusted analyses; and analyses of continuous risk factor data.

| <b>Tables:</b>                                                                                                                                                                                                                                                                                                                                          | <b>Page</b> |
|---------------------------------------------------------------------------------------------------------------------------------------------------------------------------------------------------------------------------------------------------------------------------------------------------------------------------------------------------------|-------------|
| <u>Supplementary Table 1: Definitions and codes</u>                                                                                                                                                                                                                                                                                                     | 5           |
| <u>Supplementary Table 2: Descriptive data</u>                                                                                                                                                                                                                                                                                                          | 9           |
| <u>Supplementary Table 3: Obesity measures and association with DPN; results for analyses using continuous data including the analyses using a unit of 1 SD.</u>                                                                                                                                                                                        | 11          |
| <u>Supplementary Table 4: Sex-stratified analyses: Obesity measures and association with DPN</u>                                                                                                                                                                                                                                                        | 12          |
| <u>Supplementary Table 5: Obesity and non-obesity risk factors and the association with DPN; results for analyses using categorical data. This table includes analyses of additional risk factors measured at baseline as well as BMI, smoking, and alcohol (i.e. those factors for which changes are reported) measured at questionnaire time 2016</u> | 13          |
| <u>Supplementary Table 6: Non-obesity risk factors and association with DPN: results for analyses using continuous data</u>                                                                                                                                                                                                                             | 14          |
| <u>Supplementary Table 7: Obesity and non-obesity risk factors and pain occurrence in DPN; results for analyses using categorical data including analyses of additional risk factors measured at baseline as well as BMI, smoking, and alcohol (i.e. those factors for which changes are reported) measured at questionnaire time 2016</u>              | 15          |
| <u>Supplementary Table 8: Obesity measures and pain occurrence in DPN; results for analyses using continuous data including the analyses using a unit of 1 SD</u>                                                                                                                                                                                       | 16          |
| <u>Supplementary Table 9: Non-obesity measures and association with pain occurrence in DPN; results for analyses using continuous data</u>                                                                                                                                                                                                              | 17          |
| <u>Supplementary Table 10: Sex-stratified analyses, Obesity measures and the association with pain occurrence in DPN</u>                                                                                                                                                                                                                                | 18          |
| <u>Supplementary Table 11: Non-obesity risk factors and the association with DPN: additional adjustment for central obesity and HbA1c</u>                                                                                                                                                                                                               | 19          |
| <u>Supplementary Table 12: Obesity measures and the association with DPN: additional adjustment for HbA1c</u>                                                                                                                                                                                                                                           | 21          |

| <b>Figures:</b>                                                                                                     | <b>Page</b> |
|---------------------------------------------------------------------------------------------------------------------|-------------|
| <u>Supplementary Figure 1: Flowchart</u>                                                                            | 22          |
| <u>Supplementary Figure 2: DPN definitions</u>                                                                      | 23          |
| <u>Supplementary Figure 3: Spline regressions</u>                                                                   | 24          |
| <u>Supplementary Figure 4: Central obesity measures and the association with DPN, additionally adjusted for BMI</u> | 27          |

## TABLES

| Supplementary Table 1: Definitions and codes used in this study                                                                                                                                                                     |                                                                                                                                                                                                                                                                                                                                                                                                                                                                                                                                                                                                               |
|-------------------------------------------------------------------------------------------------------------------------------------------------------------------------------------------------------------------------------------|---------------------------------------------------------------------------------------------------------------------------------------------------------------------------------------------------------------------------------------------------------------------------------------------------------------------------------------------------------------------------------------------------------------------------------------------------------------------------------------------------------------------------------------------------------------------------------------------------------------|
| Variable                                                                                                                                                                                                                            | Definition and codes                                                                                                                                                                                                                                                                                                                                                                                                                                                                                                                                                                                          |
| DDDA/DD2/IDNC variables                                                                                                                                                                                                             |                                                                                                                                                                                                                                                                                                                                                                                                                                                                                                                                                                                                               |
| DDDA variables<br>-Blood pressure<br>-Lipids<br>-HbA1c<br>-Smoking baseline<br>-BMI (see anthropometric data)                                                                                                                       | Categories:<br>Systolic blood pressure: $\leq 130$<br>Diastolic blood pressure: $\leq 80$<br>Lipids<br>LDL: $< 1.8/1.8-2.6, \geq 2.6$<br>HDL (male/female): $< 1.0/1.2, \geq 1.0/1.2$<br>Triglycerides: $\leq 1.7$<br>Total cholesterol: $\leq 4.3$<br>HbA1c, mmol/mol: $< 48, 48-57, 58-67, 68-77, \geq 78$<br>HbA1c, %: $< 6.5, 6.5-7.4, 7.5-8.4, 8.5-9.4, \geq 9.5$<br>Smoking: Never, former, current (daily + occasionally)<br><u>References:</u><br><a href="https://www.nbv.cardio.dk/dyslipidaemi">https://www.nbv.cardio.dk/dyslipidaemi</a><br>American Diabetes Association 2003<br>BMI: see below |
| DD2 core variables<br>-low-grade inflammation/hsCRP<br>-C-peptide<br>-Physical activity, baseline<br>-Alcohol, baseline<br>-Waist circumference<br>-Waist-hip ratio<br>-Waist-height ratio<br>-BMI age 20 (see anthropometric data) | Low-grade inflammation: excluding measures of hsCRP $\geq 10$ mg/L in order to exclude values related to potential ongoing infection.<br>Physical activity: "number of days with minimum 30 minutes of physical activity per week".<br>Categories<br>Low-grade inflammation: $< 1.0, 1.0-2.9, \geq 3.0$ mg/L<br>Physical activity: 0, 1-2, $\geq 3$ days/week<br>Alcohol: $\leq 21/14$ units/week for male/female, which was the recommended safe dose in 2010, where the DD2 began enrollment<br>Waist circumference: see below<br>Waist-hip ratio: see below<br>Waist-height ratio: see below               |
| Questionnaire 2016 variables<br>-Smoking<br>-Physical activity<br>-BMI                                                                                                                                                              | Physical activity: "number of days with minimum 30 minutes of physical activity per week".<br>Categories:<br>Smoking: Never, former, current (daily + occasionally)<br>Physical activity: 0, 1-2, $\geq 3$ days/week<br>BMI: see below                                                                                                                                                                                                                                                                                                                                                                        |
| Anthropometric data                                                                                                                                                                                                                 |                                                                                                                                                                                                                                                                                                                                                                                                                                                                                                                                                                                                               |
| Height                                                                                                                                                                                                                              | Data on height is available from 3 different sources:<br>DD2 enrollment (2016 onwards), DDDA data (repeated measures), questionnaire data 2016 (self-reported).<br>Regarding DDDA data: a mean height based on all available DDDA heights where calculated for all patients 18 years or older.<br>Heights below 130 cm and above 220 were considered outliers and not included in any calculations.<br><br>See variables below for hierarchically order of the height                                                                                                                                         |

|                        |                                                                                                                                                                                                                                                                                                                                                                                                                                                                                                                                                                                                                                                                                                                                                                                                                                                                                                                                               |
|------------------------|-----------------------------------------------------------------------------------------------------------------------------------------------------------------------------------------------------------------------------------------------------------------------------------------------------------------------------------------------------------------------------------------------------------------------------------------------------------------------------------------------------------------------------------------------------------------------------------------------------------------------------------------------------------------------------------------------------------------------------------------------------------------------------------------------------------------------------------------------------------------------------------------------------------------------------------------------|
| BMI age 20 years       | <p>Weight:<br/>Recalled at DD2 enrollment. Weights below 35 and above 300 kg were considered outliers and not included in the BMI calculation.</p> <p>Height:<br/>We do not expect height to change over time among these adults. Thus, we used the available heights in a hierarchically order; height from questionnaire survey in 2016, DD2 enrollment, DDDA. That is, if a patient has a height recorded from the questionnaire, we will use that height. If not, we will use the DD2 enrollment height (measured by health personal, but only a few available measures [not part of the DD2 core data initially]) and if no DD2 enrollment height is available, we will use DDDA height.</p> <p>Categories:<br/>BMI age 20 years: &lt;25, 25-29, 30-34, ≥35 kg/m<sup>2</sup></p>                                                                                                                                                         |
| BMI baseline           | <p>Weight:<br/>If weight recorded as part of the DD2 enrollment process is available (few [not part of the DD2 core data initially]), we used that weight measure, otherwise the DDDA weight. Weights below 35 and above 300 kg were considered outliers and not included in the BMI calculation.</p> <p>Height:<br/>We do not expect height to change over time among these adults. Thus, we used the available heights in a hierarchically order; height from questionnaire survey in 2016, DD2 enrollment, DDDA. That is, if a patient has a height recorded from the questionnaire, we will use that height. If not, we will use the DD2 enrollment height (measured by health personal, but only a few available measures [not part of the DD2 core data initially]) and if no DD2 enrollment height is available, we will use DDDA height.</p> <p>Categories:<br/>BMI at DD2 enrollment: &lt;25, 25-29, 30-34, ≥35 kg/m<sup>2</sup></p> |
| BMI questionnaire 2016 | <p>Will be based solely on the weight and height data from the 2016 questionnaire survey in order to report the exact same number of missing as in other paper based solely on the neuropathy questionnaire data. (That means 90 missing vs. 73 with if we instead had used the height variable that was used in calculation of the other anthropometric variables)</p> <p>Categories:<br/>BMI at DD2 enrollment: &lt;25, 25-29, 30-34, ≥35 kg/m<sup>2</sup></p>                                                                                                                                                                                                                                                                                                                                                                                                                                                                              |
| Waist circumference    | <p>Categories:<br/>Male/female: &lt; 94/80 cm, 94-101/80-87 cm, ≥102/88 cm</p> <p>Reference:<br/>WHO: World health Organ Tech Rep Ser 2000;894:i-xii, 1-253<br/>IDF: Diabet Med 2006;23:469-480</p>                                                                                                                                                                                                                                                                                                                                                                                                                                                                                                                                                                                                                                                                                                                                           |

|                        |                                                                                                                                                                                                                                                                                                                                                                                                                                                                                                                                                                                                                                                                                                             |
|------------------------|-------------------------------------------------------------------------------------------------------------------------------------------------------------------------------------------------------------------------------------------------------------------------------------------------------------------------------------------------------------------------------------------------------------------------------------------------------------------------------------------------------------------------------------------------------------------------------------------------------------------------------------------------------------------------------------------------------------|
| Waist-hip ratio        | <p>Categories:</p> <p>Male/female:</p> <p>&lt; 0.95/0.85</p> <p>0.95 - 0.99/0.85 - 0.89</p> <p>1.00 - 1.04/0.90 - 0.94</p> <p>≥1.05/0.95</p> <p>References:</p> <p>We based our categories on often used waist-hip ratio classifications in the scientific literature together with observations of baseline WHR distributions in our cohort.</p>                                                                                                                                                                                                                                                                                                                                                           |
| Waist-height ratio     | <p>Categories:</p> <p>&lt;0.5, 0.5-0.6, ≥0.6</p> <p>Reference:</p> <p>Schneider et al. J Clin Endocrinol Metab 2007;92(2):589-594</p>                                                                                                                                                                                                                                                                                                                                                                                                                                                                                                                                                                       |
| Prescription data      | <p>For all prescription data the relevant time period is around baseline = DD2 enrollment.</p> <p>Thus, lookback period is 1 year prior to DD2 enrollment date</p>                                                                                                                                                                                                                                                                                                                                                                                                                                                                                                                                          |
| Lipidlowering drugs    | ATC: C10                                                                                                                                                                                                                                                                                                                                                                                                                                                                                                                                                                                                                                                                                                    |
| Antihypertensives      | ATC: C02, C03, C07, C08, C09                                                                                                                                                                                                                                                                                                                                                                                                                                                                                                                                                                                                                                                                                |
| Glucose-lowering drugs | <p>ATC: A10</p> <p>Categories:</p> <p>No GLD: no A10 prescription redemption</p> <p>Non-insulin only: ≥1 prescription redemption of A10B and NO prescription redemption of A10A</p> <p>Insulin only: ≥1 prescription redemption of A10A and NO prescription redemption of A10B</p> <p>Non-insulin + insulin: ≥1 prescription redemption of A10B and ≥1 prescription redemption of A10A</p>                                                                                                                                                                                                                                                                                                                  |
| Diabetes duration      | <p>Determined as the period time following either i) a first-time prescription redemption of a glucose-lowering drug, ii) a hospital record of diabetes, iii) an HbA1c ≥48 mmol/mol (DDDA data), or iv) time of DD2-enrolment.</p>                                                                                                                                                                                                                                                                                                                                                                                                                                                                          |
| Metabolic syndrome     | <p>Defined using the International Diabetes Federation metabolic syndrome definition:</p> <p>Metabolic syndrome:</p> <p>Central obesity (defined as waist circumference ≥94/80 cm [male/female], i.e. European ethnic specific value) AND any two of the following:</p> <p>a) Raised triglycerides ≥ 1.7 mmol/L, or treatment for this lipid abnormality.</p> <p>b) Reduced HDL cholesterol &lt; 1.03 mmol/L (males)/1.29 mmol/mol (females), or treatment for this lipid abnormality.</p> <p>c) Raised blood pressure: systolic ≥ 130 mmHg or diastolic ≥ 85 mmHg, or treatment for hypertension.</p> <p>d) Raised fasting plasma glucose ≥ 5.6 mmol/L or diagnosed type 2 diabetes.</p> <p>Reference:</p> |

|  |                                                                                                                                                                                                                                                                                              |
|--|----------------------------------------------------------------------------------------------------------------------------------------------------------------------------------------------------------------------------------------------------------------------------------------------|
|  | International Diabetes federation, <a href="https://www.idf.org/e-library/consensus-statements/60-idfconsensus-worldwide-definitionof-the-metabolic-syndrome.html">https://www.idf.org/e-library/consensus-statements/60-idfconsensus-worldwide-definitionof-the-metabolic-syndrome.html</a> |
|--|----------------------------------------------------------------------------------------------------------------------------------------------------------------------------------------------------------------------------------------------------------------------------------------------|



| Supplementary Table 2: Patient characteristics of the total cohort of 5,249 DD2 patients and of the subcohort of 3,623 DD2 patients that could be linked to the DDDA |                   |                      |                    |                                |                              |
|----------------------------------------------------------------------------------------------------------------------------------------------------------------------|-------------------|----------------------|--------------------|--------------------------------|------------------------------|
|                                                                                                                                                                      | All, N = 5,249    | MNSIq < 4, N = 4,311 | MNSIq ≥ 4, N = 938 | MNSIq ≥ 4                      |                              |
|                                                                                                                                                                      |                   |                      |                    | No pain or DN4 < 3,<br>N = 552 | Pain and DN4 ≥ 3,<br>N = 386 |
|                                                                                                                                                                      | Total             | No DPN               | DPN                | Non-painful DPN                | Painful DPN                  |
| Total cohort, N = 5249                                                                                                                                               |                   |                      |                    |                                |                              |
| Total, N                                                                                                                                                             | 5249              | 4311 (82.1)          | 938 (17.9)         | 552 (10.5)                     | 386 (7.4)                    |
| Age, questionnaire 2016, N=5249                                                                                                                                      | 65.4 (56.6; 71.5) | 65.8 (57.2; 71.7)    | 63.1 (54.9; 70.3)  | 62.8 (54.9; 70.0)              | 64.0 (55.3; 70.8)            |
| Female sex, N=5249                                                                                                                                                   | 2216 (42.2)       | 1770 (41.1)          | 446 (47.5)         | 258 (46.7)                     | 188 (48.7)                   |
| Diabetes duration, questionnaire 2016, years, N=5247                                                                                                                 | 4.6 (3.5; 5.7)    | 4.5 (3.4; 5.7)       | 4.8 (3.7; 6.0)     | 4.7 (3.6; 5.9)                 | 4.9 (3.8; 6.1)               |
| Height, N=5220                                                                                                                                                       | 173 (166; 180)    | 173 (166; 179)       | 172 (165; 180)     | 172 (165; 180)                 | 173 (166; 180)               |
| BMI, age 20 years, kg/m <sup>2</sup> , N=4542                                                                                                                        | 23.2 (21.0; 25.5) | 23.2 (21.0; 25.5)    | 23.2 (20.9; 25.7)  | 23.3 (21.1; 25.8)              | 23.1 (20.5; 25.2)            |
| BMI, questionnaire 2016, kg/m <sup>2</sup> , N=5159                                                                                                                  | 29.7 (26.4; 33.6) | 29.4 (26.2; 33.1)    | 31.2 (27.7; 35.7)  | 31.2 (27.8; 35.5)              | 31.5 (27.5; 35.7)            |
| Waist circumference, cm, baseline, N=5239                                                                                                                            | 106 (97; 116)     | 105 (96; 115)        | 110 (100; 119)     | 110 (100; 120)                 | 110 (100; 119)               |
| Waist-hip ratio, baseline, N=5237                                                                                                                                    | 0.98 (0.92; 1.04) | 0.98 (0.92; 1.04)    | 0.98 (0.92; 1.04)  | 0.98 (0.92; 1.04)              | 0.99 (0.93; 1.04)            |
| Waist-height ratio, N=5210                                                                                                                                           | 0.61 (0.56; 0.67) | 0.61 (0.56; 0.66)    | 0.63 (0.58; 0.69)  | 0.63 (0.58; 0.70)              | 0.64 (0.58; 0.69)            |
| Low-grade inflammation (hsCRP),* mg/L, N=4722                                                                                                                        | 1.7 (0.8; 3.4)    | 1.6 (0.7; 3.1)       | 2.2 (1.0; 4.2)     | 2.2 (0.9; 4.2)                 | 2.2 (1.0; 4.2)               |
| C-peptide, pmol/L, N=4353                                                                                                                                            | 1149 (856; 1553)  | 1128 (841; 1516)     | 1266 (958; 1701)   | 1256 (927; 1691)               | 1276 (978; 1717)             |
| Physical activity,† baseline, days/week, N=5247                                                                                                                      | 4 (2; 7)          | 4 (2; 7)             | 3 (1; 7)           | 3 (1; 7)                       | 3 (1; 7)                     |
| Physical activity,† questionnaire 2116, days/week, N=5189                                                                                                            | 4 (2; 6)          | 4 (2; 6)             | 3 (1; 6)           | 3 (2; 5)                       | 3 (1; 6)                     |
| Alcohol, baseline, N=5247                                                                                                                                            |                   |                      |                    |                                |                              |
| > 21/14 units/week (male/female)                                                                                                                                     | 343 (6.5)         | 277 (6.4)            | 66 (7.0)           | 32 (5.8)                       | 34 (8.8)                     |
| Smoking, questionnaire 2016, N=5231                                                                                                                                  |                   |                      |                    |                                |                              |
| Never                                                                                                                                                                | 1850 (35.4)       | 1584 (36.9)          | 266 (28.4)         | 174 (31.5)                     | 92 (23.8)                    |
| Former                                                                                                                                                               | 2361 (45.1)       | 1909 (44.5)          | 452 (48.2)         | 253 (45.8)                     | 199 (51.6)                   |
| Current                                                                                                                                                              | 1020 (19.5)       | 800 (18.6)           | 220 (23.5)         | 125 (22.6)                     | 95 (24.6)                    |
| Antihypertensive drug use, N=5247                                                                                                                                    | 3874 (73.8)       | 3147 (73.0)          | 727 (77.5)         | 426 (77.2)                     | 301 (78.0)                   |
| Lipid lowering drug use, N=5247                                                                                                                                      | 3764 (71.7)       | 3102 (72.0)          | 662 (70.6)         | 396 (71.7)                     | 266 (68.9)                   |
| Glucose-lowering drug use, N=5247                                                                                                                                    |                   |                      |                    |                                |                              |
| Any glucose-lowering drug                                                                                                                                            | 4460 (85.0)       | 3640 (84.5)          | 820 (87.4)         | 477 (86.4)                     | 343 (88.9)                   |
| Non-insulin glucose-lowering drug only                                                                                                                               | 4143 (79.0)       | 3408 (79.1)          | 735 (78.4)         | 432 (78.3)                     | 303 (78.5)                   |
| Insulin only                                                                                                                                                         | 53 (1.0)          | 39 (0.9)             | 14 (1.5)           | 7 (1.3)                        | 7 (1.8)                      |
| Both insulin + non-insulin glucose-lowering drug                                                                                                                     | 264 (5.0)         | 193 (4.5)            | 71 (7.6)           | 38 (6.9)                       | 33 (8.6)                     |
| Subcohort, N = 3,623                                                                                                                                                 |                   |                      |                    |                                |                              |
| BMI, baseline, kg/m <sup>2</sup> , N=3263                                                                                                                            | 30.3 (27.1; 34.3) | 30.0 (26.8; 34.0)    | 31.8 (28.1; 36.0)  | 32.0 (28.4; 36.0)              | 31.5 (27.7; 36.0)            |
| Systolic blood pressure, mmHg, N=3387                                                                                                                                | 130 (124; 140)    | 130 (124; 140)       | 130 (124; 140)     | 130 (123; 140)                 | 130 (124; 142)               |
| Diastolic blood pressure, mmHg, N=3387                                                                                                                               | 80 (75; 86)       | 80 (74; 85)          | 80 (75; 86)        | 80 (75; 87)                    | 80 (75; 86)                  |
| Dyslipidemia                                                                                                                                                         |                   |                      |                    |                                |                              |
| Total cholesterol, mmol/L, N=2267                                                                                                                                    | 4.3 (3.7; 5.1)    | 4.3 (3.7; 5.1)       | 4.4 (3.8; 5.1)     | 4.3 (3.7; 5.0)                 | 4.5 (3.9; 5.3)               |
| HDL cholesterol, mmol/L, N=2274                                                                                                                                      | 1.2 (1.0; 1.5)    | 1.2 (1.0; 1.5)       | 1.2 (1.0; 1.4)     | 1.2 (1.0; 1.4)                 | 1.2 (1.0; 1.4)               |
| LDL, mmol/L, N=3433                                                                                                                                                  | 2.2 (1.7; 2.8)    | 2.2 (1.7; 2.8)       | 2.2 (1.7; 2.9)     | 2.2 (1.7; 2.8)                 | 2.3 (1.8; 2.9)               |
| Triglycerides, mmol/L, N=3302                                                                                                                                        | 1.6 (1.1; 2.3)    | 1.6 (1.1; 2.3)       | 1.9 (1.3; 2.6)     | 1.8 (1.2; 2.5)                 | 1.9 (1.3; 2.9)               |
| Glycemic control (HbA1c), mmol/mol, N=3536                                                                                                                           | 47 (43; 53)       | 47 (43; 53)          | 48 (42; 56)        | 47 (42; 57)                    | 48 (43; 55)                  |
| Glycemic control (HbA1c), %, N=3536                                                                                                                                  | 6.5 (6.1; 7.0)    | 6.5 (6.1; 7.0)       | 6.5 (6.0; 7.3)     | 6.5 (6.0; 7.4)                 | 6.5 (6.1; 7.2)               |
| Smoking, baseline, N=3437                                                                                                                                            |                   |                      |                    |                                |                              |
| Never                                                                                                                                                                | 1643 (47.8)       | 1398 (49.4)          | 245 (40.3)         | 154 (42.9)                     | 91 (36.6)                    |
| Former                                                                                                                                                               | 1189 (34.6)       | 960 (33.9)           | 229 (37.7)         | 128 (35.7)                     | 101 (40.6)                   |
| Current                                                                                                                                                              | 605 (17.6)        | 471 (16.7)           | 134 (22.0)         | 77 (21.5)                      | 57 (22.9)                    |

---

Abbreviations: MNSIq; Michigan Neuropathy Screening Instrument questionnaire, DN4; Douleur Neuropathique en 4 questions, DPN; diabetic polyneuropathy, DD2; The Danish Centre for Strategic Research in Type 2 Diabetes, DDDA; Danish Diabetes Database for Adults, BMI; body mass index, hsCRP; high-sensitivity C-reactive protein, HbA1c; hemoglobin A1c.

\*Of note, CRP value was available for 5111, of which 389 had hsCRP  $\geq 10$  mg/L

†Days per week with minimum 30 minutes of physical activity

Missing data in the total cohort (n = 5249); height (n = 29 missing); BMI at 20 years (n = 707 missing); BMI at questionnaire 2016 (n = 90); waist circumference (n = 10 missing); waist-hip ratio (n = 12 missing), waist-height ratio (n = 39 missing), low-grade inflammation (n = 138 missing hsCRP, 389 with hsCRP  $\geq 10$  mg/L); C-peptide (n = 896 missing); physical activity at baseline (n = 2 missing); physical activity at questionnaire 2016 (n = 60), alcohol at baseline (n = 2 missing), alcohol at questionnaire 2016 (n = 70), smoking at questionnaire (n = 0 18), remaining variables (n = 0 missing)

Missing data in the DDDA-subcohort (n = 3623): BMI at baseline (n = 360); blood pressure (n = 236 missing); total cholesterol (n = 1356 missing); HDL cholesterol (n = 1,349 missing); LDL cholesterol (n = 190 missing); triglycerides (n = 321 missing); HbA1c (n = 87 missing); albumin/creatinine ratio (n = 0 missing), smoking at baseline (n = 186 missing).

| Supplementary Table 3: Prevalence ratios of DPN for different obesity measures, continuous data |       |                       |
|-------------------------------------------------------------------------------------------------|-------|-----------------------|
|                                                                                                 |       | DPN (MNSIq $\geq 4$ ) |
|                                                                                                 | Total | aPR (95% CI)          |
| General obesity                                                                                 |       |                       |
| BMI, baseline (unit = 2 kg/m <sup>2</sup> )                                                     | 3263  | 1.07 (1.04; 1.09)     |
| BMI, questionnaire 2016, 2016 (unit = 2 kg/m <sup>2</sup> )                                     | 5159  | 1.07 (1.06; 1.09)     |
| Central obesity                                                                                 |       |                       |
| Waist circumference (unit = 5 cm)                                                               | 5239  | 1.08 (1.06; 1.10)     |
| Waist-hip ratio (unit = 0.1 cm/cm)                                                              | 5237  | 1.16 (1.09; 1.24)     |
| Waist-height ratio (unit = 0.1 cm/cm)                                                           | 5210  | 1.29 (1.22; 1.37)     |
| Per 1 SD increase*                                                                              |       |                       |
| BMI, baseline                                                                                   | 3259  | 1.22 (1.14; 1.30)     |
| Waist circumference                                                                             | 3259  | 1.27 (1.20; 1.35)     |
| Waist-hip ratio                                                                                 | 3259  | 1.15 (1.07; 1.23)     |
| Waist-height ratio                                                                              | 3259  | 1.23 (1.16; 1.31)     |

Abbreviations: DPN; diabetic polyneuropathy, MNSIq; Michigan Neuropathy Screening Instrument questionnaire, aPR; adjusted prevalence ratio, CI; confidence interval, DD2; The Danish Centre for Strategic Research in Type 2 Diabetes, BMI; body mass index.

\*The analyses with a unit of 1 SD were restricted to the 3259 patients with available data on all four obesity measures at baseline = DD2 enrollment. This restriction was applied in order to be able to compare the magnitude of the effect across obesity measures.

All analyses are adjusted for age, sex, and diabetes duration.

| Supplementary Table 4: Sex-stratified: Prevalence ratios of DPN for different obesity measures |                       |                   |
|------------------------------------------------------------------------------------------------|-----------------------|-------------------|
|                                                                                                | DPN (MNSIq $\geq 4$ ) |                   |
|                                                                                                | aPR (95% CI)          |                   |
|                                                                                                | Female                | Male              |
| General obesity = BMI measures                                                                 |                       |                   |
| BMI, age 20 years, kg/m <sup>2</sup>                                                           |                       |                   |
| < 18.5                                                                                         | 1.24 (0.95; 1.62)     | 0.92 (0.48; 1.75) |
| 18.5 - 24                                                                                      | 1 (ref)               | 1 (ref)           |
| 25 - 29                                                                                        | 1.05 (0.81; 1.36)     | 0.82 (0.66; 1.02) |
| 30 - 34                                                                                        | 1.40 (0.97; 2.02)     | 1.27 (0.93; 1.75) |
| $\geq 35$                                                                                      | 1.40 (0.88; 2.22)     | 1.40 (0.92; 2.14) |
| BMI, baseline, kg/m <sup>2</sup>                                                               |                       |                   |
| < 25                                                                                           | 1 (ref)               | 1 (ref)           |
| 25 - 29                                                                                        | 1.29 (0.85; 1.96)     | 1.26 (0.83; 1.92) |
| 30 - 34                                                                                        | 1.74 (1.16; 2.60)     | 1.54 (1.01; 2.34) |
| $\geq 35$                                                                                      | 1.84 (1.22; 2.77)     | 1.88 (1.22; 2.88) |
| BMI, questionnaire 2016, kg/m <sup>2</sup>                                                     |                       |                   |
| < 25                                                                                           | 1 (ref)               | 1 (ref)           |
| 25 - 29                                                                                        | 1.42 (1.02; 1.95)     | 1.35 (0.99; 1.85) |
| 30 - 34                                                                                        | 1.80 (1.32; 2.47)     | 1.73 (1.26; 2.38) |
| $\geq 35$                                                                                      | 2.23 (1.62; 3.07)     | 2.09 (1.50; 2.91) |
| BMI change*, kg/m <sup>2</sup>                                                                 |                       |                   |
| < 4                                                                                            | 1 (ref)               | 1 (ref)           |
| 4 - 6                                                                                          | 1.48 (1.09; 2.01)     | 1.17 (0.93; 1.48) |
| 7 - 9                                                                                          | 1.38 (1.00; 1.90)     | 1.17 (0.91; 1.51) |
| $\geq 10$                                                                                      | 2.13 (1.63; 2.78)     | 1.77 (1.42; 2.22) |
| Central obesity measures                                                                       |                       |                   |
| Waist circumference (M/F), cm                                                                  |                       |                   |
| < 94/80 cm                                                                                     | 1 (ref)               | 1 (ref)           |
| 94-102/80-88                                                                                   | 1.53 (0.83; 2.83)     | 1.71 (1.08; 2.70) |
| $\geq 102/88$                                                                                  | 1.90 (1.10; 3.25)     | 2.73 (1.81; 4.13) |
| Waist-hip ratio (M/F)                                                                          |                       |                   |
| < 0.95/0.85                                                                                    | 1 (ref)               | 1 (ref)           |
| 0.95 - 0.99/0.85 - 0.89                                                                        | 1.11 (0.82; 1.51)     | 1.41 (1.00; 1.98) |
| 1 - 1.04/0.90 - 0.94                                                                           | 1.25 (0.94; 1.66)     | 1.89 (1.39; 2.55) |
| $\geq 1.05/0.95$                                                                               | 1.27 (0.96; 1.69)     | 2.13 (1.57; 2.89) |
| Waist-height ratio                                                                             |                       |                   |
| < 0.5                                                                                          | 1 (ref)               | 1 (ref)           |
| 0.5 - 0.6                                                                                      | 1.38 (0.87; 2.18)     | 1.78 (0.96; 3.29) |
| $\geq 0.6$                                                                                     | 1.85 (1.19; 2.88)     | 2.84 (1.55; 5.20) |

Abbreviations: DPN; Diabetic polyneuropathy, MNSIq; Michigan Neuropathy Screening Instrument questionnaire  
aPR; adjusted prevalence ratio, CI; confidence interval, DD2; The Danish Centre for Strategic Research in Type 2  
Diabetes, BMI; body mass index, M/F; male/female

\*BMI change from age 20 to questionnaire 2016.

All analyses are adjusted for age, sex, and diabetes duration

Supplementary Table 5: Prevalence ratios of DPN for additional risk factors measured at baseline and at questionnaire 2016, categorical data

|                                            | DPN (MNSIq $\geq 4$ ) |              |                   |
|--------------------------------------------|-----------------------|--------------|-------------------|
|                                            | Total                 | N events (%) | aPR (95% CI)      |
| Total, N (%)                               | 5249                  | 938 (17.9)   |                   |
| BMI, questionnaire 2016, kg/m <sup>2</sup> | 5159                  |              |                   |
| <25                                        | 792                   | 87 (11.0)    | 1 (ref)           |
| 25-29                                      | 1899                  | 287 (15.1)   | 1.39 (1.11; 1.74) |
| 30-34                                      | 1493                  | 297 (19.9)   | 1.78 (1.02; 1.51) |
| $\geq 35$                                  | 975                   | 248 (25.4)   | 1.90 (1.61; 2.25) |
| HbA1c, %                                   | 3536                  |              |                   |
| < 6.5                                      | 1848                  | 307 (16.6)   | 1 (ref)           |
| 6.5 – 7.4                                  | 1119                  | 188 (16.8)   | 1.00 (0.85; 1.18) |
| 7.5 – 8.4                                  | 299                   | 66 (22.1)    | 1.26 (1.00; 1.60) |
| 8.5 – 9.4                                  | 124                   | 38 (30.7)    | 1.71 (1.29; 2.27) |
| $\geq 9.5$                                 | 146                   | 31 (21.2)    | 1.23 (0.88; 1.71) |
| Glucose-lowering drug use                  | 5249                  |              |                   |
| No                                         | 789                   | 118 (15.0)   | 1 (ref)           |
| Yes                                        | 4460                  | 820 (18.4)   | 1.15 (0.96; 1.38) |
| Insulin use*                               |                       |              |                   |
| No                                         | 4143                  | 735 (17.7)   | 1 (ref)           |
| Yes                                        | 317                   | 85 (26.8)    | 1.43 (1.18; 1.75) |
| Physical activity, questionnaire 2016†     | 5189                  |              |                   |
| 0                                          | 539                   | 150 (27.8)   | 1.67 (1.43; 1.96) |
| 1 – 2                                      | 1076                  | 195 (18.1)   | 1.09 (0.94; 1.26) |
| $\geq 3$                                   | 3574                  | 581 (16.9)   | 1 (ref)           |
| Physical activity, change, stratified‡     |                       |              |                   |
| Baseline, activity level = 0 days          | 756                   |              |                   |
| 2016: no change                            | 226                   | 76 (33.6)    | 1 (ref)           |
| 2016: more active                          | 530                   | 118 (22.3)   | 0.67 (0.52; 0.85) |
| Baseline, activity level = 1-2 days        | 1035                  |              |                   |
| 2016: less active                          | 223                   | 49 (22.0)    | 1.08 (0.75; 1.56) |
| 2016: no change                            | 218                   | 44 (20.2)    | 1 (ref)           |
| 2016: more active                          | 594                   | 113 (19.0)   | 0.94 (0.69; 1.29) |
| Baseline, activity level $\geq 3$ days     | 3396                  |              |                   |
| 2016: less active                          | 1694                  | 282 (16.7)   | 1.20 (1.00; 1.46) |
| 2016: no change                            | 999                   | 133 (13.3)   | 1 (ref)           |
| 2016: more active                          | 703                   | 111 (15.8)   | 1.14 (0.91; 1.45) |
| Smoking, questionnaire 2016                | 5231                  |              |                   |
| Never                                      | 1850                  | 266 (14.4)   | 1 (ref)           |
| Former                                     | 2361                  | 452 (19.1)   | 1.43 (1.25; 1.65) |
| Current                                    | 1020                  | 220 (21.6)   | 1.52 (1.30; 1.79) |
| Metabolic syndrome                         | 4941                  |              |                   |
| No                                         | 425                   | 35 (8.2)     | 1 (ref)           |
| Yes                                        | 4516                  | 848 (18.8)   | 2.19 (1.58; 3.02) |

Abbreviations: DPN; diabetic polyneuropathy, MNSIq; Michigan Neuropathy Screening Instrument questionnaire, DN4; Douleur Neuropathique en 4 questions, aPR; adjusted prevalence ratio, CI; confidence interval, DD2; The Danish Centre for Strategic Research in Type 2 Diabetes, hsCRP; high-sensitivity C-reactive protein, HbA1c; hemoglobin A1c. All analyses are adjusted for age, and diabetes duration

\*Among those who use glucose-lowering drugs

†Days per week with minimum 30 minutes of physical activity

‡Stratified according to activity level at baseline = DD2 enrollment

| Supplementary Table 6: Prevalence ratios of DPN for non-obesity risk factors, continuous data |       |                               |
|-----------------------------------------------------------------------------------------------|-------|-------------------------------|
|                                                                                               | Total | DPN                           |
|                                                                                               |       | MNSIq $\geq 4$<br>aPR(95% CI) |
| Systolic blood pressure (unit = 10 mmHg)                                                      | 3387  | 1.00 (0.95; 1.05)             |
| Diastolic blood pressure (unit = 5 mmHg)                                                      | 3387  | 1.02 (0.98; 1.05)             |
| Total cholesterol (unit = 0.5 mmol/l)                                                         | 2267  | 0.99 (0.95; 1.04)             |
| LDL cholesterol (unit = 0.25 mmol/l)                                                          | 3433  | 1.01 (0.99; 1.03)             |
| HDL cholesterol (unit = 0.25 mmol/l)                                                          | 2274  | 0.92 (0.86; 0.98)             |
| Triglycerides (unit = 0.5 mmol/l)                                                             | 3302  | 1.04 (1.02; 1.06)             |
| Low-grade inflammation, hsCRP (unit = 1)                                                      | 4722  | 1.08 (1.06; 1.11)             |
| C-peptide (Unit = 25 pmol/l)                                                                  | 4353  | 1.01 (1.00; 1.01)             |
| HbA1c (unit = 10 mmol/mol)                                                                    | 3536  | 1.05 (1.01; 1.09)             |
| HbA1c (unit = 1%)                                                                             | 3536  | 1.06 (1.01; 1.10)             |
| Physical activity, baseline (unit = 1 day)                                                    | 5247  | 0.95 (0.93; 0.97)             |

Abbreviations: DPN; diabetic polyneuropathy, MNSIq; Michigan Neuropathy Screening Instrument questionnaire, aPR; adjusted prevalence ratio, CI; confidence interval, hsCRP; high-sensitivity C-reactive protein, HbA1c; hemoglobin A1c.

All analyses are adjusted for age, sex, and diabetes duration.

Supplementary Table 7: Prevalence ratios of neuropathic pain occurrence (pain in both feet + DN4  $\geq 3$ ) among the 938 patients with DPN defined as MNSIq  $\geq 4$  for additional risk factors measured at baseline and at questionnaire 2016

|                                        | Total | Painful DPN                                    |                   |
|----------------------------------------|-------|------------------------------------------------|-------------------|
|                                        |       | MNSIq $\geq 4$ and pain in feet + DN4 $\geq 3$ | aPR (95% CI)      |
| Total, N (%)                           | 938   | N events (%)                                   | 386 (41.2)        |
| BMI, questionnaire 2016                | 919   |                                                |                   |
| < 25                                   | 87    | 37 (42.5)                                      | 1 (ref)           |
| 25 - 29                                | 287   | 115 (40.1)                                     | 0.95 (0.72; 1.26) |
| 30 - 34                                | 297   | 123 (41.4)                                     | 1.00 (0.75; 1.32) |
| $\geq 35$                              | 248   | 107 (43.2)                                     | 1.05 (0.79; 1.40) |
| HbA1c, %                               | 630   |                                                |                   |
| < 6.5                                  | 307   | 121 (39.4)                                     | 1 (ref)           |
| 6.5 – 7.4                              | 188   | 85 (45.2)                                      | 1.16 (0.94; 1.44) |
| 7.5 – 8.4                              | 66    | 28 (42.4)                                      | 1.10 (0.80; 1.51) |
| 8.5 – 9.4                              | 38    | 12 (31.6)                                      | 0.86 (0.52; 1.42) |
| $\geq 9.5$                             | 31    | 13 (41.9)                                      | 1.13 (0.73; 1.76) |
| Glucose-lowering drug use              | 938   |                                                |                   |
| No                                     | 118   | 43 (36.4)                                      | 1 (ref)           |
| Yes                                    | 820   | 343 (41.8)                                     | 1.15 (0.90; 1.49) |
| Insulin use*                           | 820   |                                                |                   |
| No                                     | 735   | 303 (41.2)                                     | 1 (ref)           |
| Yes                                    | 85    | 40 (47.1)                                      | 1.18 (0.92; 1.53) |
| Physical activity, questionnaire 2016† | 926   |                                                |                   |
| 0                                      | 150   | 68 (45.3)                                      | 1.12 (0.91; 1.37) |
| 1 - 2                                  | 195   | 76 (39.0)                                      | 0.96 (0.78; 1.17) |
| $\geq 3$                               | 581   | 235 (40.5)                                     | 1 (ref)           |
| Physical activity, change‡             |       |                                                |                   |
| Baseline, activity level = 0 days      | 194   |                                                |                   |
| 2016: no change                        | 76    | 36 (47.4)                                      | 1 (ref)           |
| 2016: more active                      | 118   | 46 (39.0)                                      | 0.83 (0.60; 1.15) |
| Baseline, activity level = 1-2 days    | 206   |                                                |                   |
| 2016: less active                      | 49    | 20 (40.8)                                      | 1.19 (0.70; 2.02) |
| 2016: no change                        | 44    | 15 (34.1)                                      | 1 (ref)           |
| 2016: more active                      | 113   | 39 (34.5)                                      | 1.01 (0.62; 1.64) |
| Baseline, activity level $\geq 3$ days | 526   |                                                |                   |
| 2016: less active                      | 282   | 119 (42.2)                                     | 0.89 (0.71; 1.11) |
| 2016: no change                        | 133   | 63 (47.4)                                      | 1 (ref)           |
| 2016: more active                      | 111   | 41 (36.9)                                      | 0.78 (0.57; 1.05) |
| Smoking, questionnaire 2016            | 938   |                                                |                   |
| Never                                  | 266   | 92 (34.6)                                      | 1 (ref)           |
| Former                                 | 452   | 199 (44.0)                                     | 1.28 (1.05; 1.56) |
| Current                                | 220   | 95 (43.2)                                      | 1.29 (1.03; 1.62) |
| Metabolic syndrome                     | 883   |                                                |                   |
| No                                     | 35    | 13 (37.1)                                      | 1 (ref)           |
| Yes                                    | 848   | 345 (40.7)                                     | 1.09 (0.70; 1.70) |

Abbreviations: DPN; diabetic polyneuropathy, MNSIq; Michigan Neuropathy Screening Instrument questionnaire, DN4; Douleur Neuropathique en 4 questions, aPR; adjusted prevalence ratio, CI; confidence interval, hsCRP; high-sensitivity C-reactive protein, HbA1c; hemoglobin A1c.

All analyses are adjusted for age, and diabetes duration

\*Among those who use glucose-lowering drugs

†Days per week with minimum 30 minutes of physical activity

‡Stratified according to activity level at baseline = DD2 enrollment

Supplementary Table 8: Prevalence ratios of neuropathic pain occurrence (pain in both feet + DN4 ≥3) among the 938 patients with DPN defined as MNSIq ≥4: continuous obesity data

|                                                        | Painful DPN                           |                   |
|--------------------------------------------------------|---------------------------------------|-------------------|
|                                                        | MNSIq ≥4 and<br>pain in feet + DN4 ≥3 |                   |
|                                                        | Total                                 | aPR (95% CI)      |
| General obesity                                        |                                       |                   |
| BMI, age 20 years (unit = 2 kg/m <sup>2</sup> )        | 816                                   | 0.97 (0.94; 1.01) |
| BMI, baseline (unit = 2 kg/m <sup>2</sup> )            | 581                                   | 0.98 (0.95; 1.01) |
| BMI, questionnaire, 2016 (unit = 2 kg/m <sup>2</sup> ) | 919                                   | 1.00 (0.98; 1.03) |
| BMI change* (unit = 2 kg/m <sup>2</sup> )              | 812                                   | 1.02 (0.99; 1.04) |
| Central obesity                                        |                                       |                   |
| Waist circumference (unit = 5 cm)                      | 937                                   | 1.01 (0.98; 1.03) |
| Waist-hip ratio (unit = 0.1 cm/cm)                     | 937                                   | 1.09 (0.98; 1.21) |
| Waist-height ratio (unit = 0.1 cm/cm)                  | 929                                   | 1.02 (0.93; 1.12) |
| Per 1 SD increase†                                     |                                       |                   |
| BMI, baseline                                          | 581                                   | 0.95 (0.86; 1.04) |
| Waist circumference                                    | 581                                   | 1.01 (0.91; 1.10) |
| Waist-hip ratio                                        | 581                                   | 1.09 (0.97; 1.23) |
| Waist-height ratio                                     | 581                                   | 0.98 (0.89; 1.08) |

Abbreviations: DPN; diabetic polyneuropathy, MNSIq; Michigan Neuropathy Screening Instrument questionnaire, DN4; Douleur Neuropathique en 4 questions, aPR; adjusted prevalence ratio, CI; confidence interval BMI; body mass index.

All analyses are adjusted for age, sex, and diabetes duration

\*BMI change from age 20 years to questionnaire 2016.

†For the analyses with a unit of 1 SD, we restricted the population to the 581 patients that had available obesity data at time of enrollment in order to be able to compare the magnitude of the effect across obesity measures.



Supplementary Table 9: Prevalence ratios of neuropathic pain occurrence (pain in both feet + DN4  $\geq 3$ ) for different metabolic risk factors measures among the 938 patients with DPN defined as MNSIq  $\geq 4$ , continuous data

|                                          | Painful DPN                                       |                   |
|------------------------------------------|---------------------------------------------------|-------------------|
|                                          | MNSIq $\geq 4$ and<br>pain in feet + DN4 $\geq 3$ |                   |
|                                          | Total                                             | aPR (95% CI)      |
| Systolic blood pressure (unit = 10 mmHg) | 599                                               | 1.03 (0.97; 1.09) |
| Diastolic blood pressure (Unit 5 mmHg)   | 599                                               | 0.98 (0.94; 1.03) |
| Total cholesterol (unit 0.5 mmol/l)      | 417                                               | 1.07 (1.01; 1.13) |
| LDL cholesterol (unit = 0.25 mmol/l)     | 594                                               | 1.02 (0.99; 1.04) |
| HDL cholesterol (unit = 0.25 mmol/l)     | 417                                               | 1.01 (0.93; 1.10) |
| Triglycerides (unit = 0.5 mmol/l)        | 585                                               | 1.03 (1.00; 1.06) |
| Lowgrade inflammation, hsCRP (unit = 1)  | 833                                               | 1.01 (0.97; 1.04) |
| C-peptide (unit = 25 pmol/l?)            | 790                                               | 1.00 (1.00; 1.00) |
| HbA1c (unit = mmol/mol)                  | 630                                               | 1.01 (0.94; 1.07) |
| HbA1c (unit = 1%)                        | 630                                               | 1.01 (0.94; 1.08) |
| Physical activity, baseline              | 938                                               | 1.01 (0.98; 1.04) |

Abbreviations: DPN; diabetic polyneuropathy, MNSIq; Michigan Neuropathy Screening Instrument questionnaire, DN4; Douleur Neuropathique en 4 questions, aPR; adjusted prevalence ratio, CI; confidence interval, hsCRP; high-sensitivity C-reactive protein, HbA1c; hemoglobin A1c.

All analyses are adjusted for age, sex, and diabetes duration.

Supplementary Table 10: Sex-stratified analyses: Prevalence ratios of neuropathic pain occurrence (pain in both feet + DN4  $\geq 3$ ) among the 938 patients with DPN defined as MNSIq  $\geq 4$  for obesity measures.

|                                             | Female<br>aPR<br>(95% CI) | Male<br>aPR<br>(95% CI) |
|---------------------------------------------|---------------------------|-------------------------|
| General obesity = BMI measures              |                           |                         |
| BMI, age 20 years, kg/m <sup>2</sup>        |                           |                         |
| < 18.5                                      | 1.13 (0.81; 1.57)         | 0.84 (0.34; 2.09)       |
| 18.5 - 24                                   | 1 (ref)                   | 1 (ref)                 |
| 25 - 29                                     | 1.01 (0.71; 1.43)         | 0.78 (0.58; 1.06)       |
| 30 - 34                                     | 0.93 (0.55; 1.58)         | 0.80 (0.49; 1.29)       |
| $\geq 35$                                   | 0.64 (0.27; 1.53)         | 0.90 (0.51; 1.68)       |
| BMI, baseline, kg/m <sup>2</sup>            |                           |                         |
| < 25                                        | 1 (ref)                   | 1 (ref)                 |
| 25 - 29                                     | 0.69 (0.44; 1.07)         | 0.82 (0.50; 1.34)       |
| 30 - 34                                     | 0.68 (0.45; 1.04)         | 0.88 (0.54; 1.44)       |
| $\geq 35$                                   | 0.66 (0.43; 1.02)         | 0.86 (0.51; 1.43)       |
| BMI, questionnaire, 2016, kg/m <sup>2</sup> |                           |                         |
| < 25                                        | 1 (ref)                   | 1 (ref)                 |
| 25 - 29                                     | 0.91 (0.61; 1.34)         | 1.00 (0.66; 1.52)       |
| 30 - 34                                     | 0.94 (0.64; 1.37)         | 1.06 (0.70; 1.61)       |
| $\geq 35$                                   | 1.00 (0.68; 1.34)         | 1.12 (0.72; 1.73)       |
| BMI change*, kg/m <sup>2</sup>              |                           |                         |
| < 4                                         | 1 (ref)                   | 1 (ref)                 |
| 4 - 6                                       | 1.05 (0.68; 1.62)         | 1.15 (0.85; 1.56)       |
| 7 - 9                                       | 1.33 (0.88; 2.01)         | 1.12 (0.80; 1.58)       |
| $\geq 10$                                   | 1.14 (0.78; 1.67)         | 1.16 (0.86; 1.58)       |
| Central obesity                             |                           |                         |
| Waist circumference (M/F), cm               |                           |                         |
| < 94/80 cm                                  | 1 (ref)                   | 1 (ref)                 |
| 94-102/80-88 cm                             | 1.24 (0.51; 3.02)         | 1.56 (0.75; 3.24)       |
| $\geq 102/88$ cm                            | 1.27 (0.57; 2.85)         | 1.50 (0.75; 3.00)       |
| Waist-hip ratio (M/F)                       |                           |                         |
| < 0.95/0.85                                 | 1 (ref)                   | 1 (ref)                 |
| 0.95 - 0.99/0.85 - 0.89                     | 0.82 (0.54; 1.26)         | 1.85 (1.09; 3.15)       |
| 1 - 1.04/0.90 - 0.94                        | 1.00 (0.69; 1.46)         | 1.50 (0.89; 2.52)       |
| $\geq 1.05/0.95$                            | 1.16 (0.81; 1.66)         | 1.61 (0.96; 2.70)       |
| Waist-height ratio                          |                           |                         |
| < 0.5                                       | 1 (ref)                   | 1 (ref)                 |
| 0.5 - 0.6                                   | 0.76 (0.46; 1.27)         | 1.36 (0.52; 3.59)       |
| $\geq 0.6$                                  | 0.87 (0.54; 1.41)         | 1.37 (0.53; 3.57)       |

Abbreviations: DPN; Diabetic polyneuropathy, MNSIq; Michigan Neuropathy Screening Instrument questionnaire

aPR; adjusted prevalence ratio, CI; confidence interval, BMI; body mass index, M/F; male/female

All analyses are adjusted for age, sex, and diabetes duration

\*BMI change from age 20 years to questionnaire 2016.

Supplementary Table 11: Prevalence ratios of DPN associated with metabolic risk factors and lifestyle factors at baseline with additional adjustment for central obesity and HbA1c

|                                                                        | Main results<br>adjusted for<br>age, sex, and<br>diabetes<br>duration | Additional<br>adjusted for<br>waist-hip ratio | Additional<br>adjusted for<br>HbA1c | Additional<br>adjusted for<br>waist-hip ratio<br>and HbA1c |
|------------------------------------------------------------------------|-----------------------------------------------------------------------|-----------------------------------------------|-------------------------------------|------------------------------------------------------------|
|                                                                        | aPR (95% CI)                                                          | aPR (95% CI)                                  | aPR (95% CI)                        | aPR (95% CI)                                               |
| <b>NON-OBESITY METABOLIC<br/>AND LIFESTYLE FACTORS AT<br/>BASELINE</b> |                                                                       |                                               |                                     |                                                            |
| Blood pressure (systolic) mmHg                                         |                                                                       |                                               |                                     |                                                            |
| < 130                                                                  | 1 (ref)                                                               | 1 (ref)                                       | 1 (ref)                             | 1 (ref)                                                    |
| ≥130                                                                   | 0.95 (0.82; 1.10)                                                     | 0.93 (0.80; 1.08)                             | 0.94 (0.81; 1.09)                   | 0.93 (0.80; 1.08)                                          |
| Blood pressure (diastolic) mmHg                                        |                                                                       |                                               |                                     |                                                            |
| < 80                                                                   | 1 (ref)                                                               | 1 (ref)                                       | 1 (ref)                             | 1 (ref)                                                    |
| ≥80                                                                    | 1.10 (0.95; 1.29)                                                     | 1.09 (0.94; 1.27)                             | 1.09 (0.93; 1.27)                   | 1.08 (0.92; 1.25)                                          |
| Antihypertensive drug use                                              |                                                                       |                                               |                                     |                                                            |
| No                                                                     | 1 (ref)                                                               | 1 (ref)                                       | 1 (ref)                             | 1 (ref)                                                    |
| Yes                                                                    | 1.34 (1.16; 1.55)                                                     | 1.30 (1.12; 1.50)                             | 1.34 (1.12; 1.61)                   | 1.31 (1.09; 1.58)                                          |
| Total cholesterol, mmol/L                                              |                                                                       |                                               |                                     |                                                            |
| < 4.3                                                                  | 1 (ref)                                                               | 1 (ref)                                       | 1 (ref)                             | 1 (ref)                                                    |
| ≥4.3                                                                   | 1.04 (0.87; 1.24)                                                     | 1.04 (0.88; 1.25)                             | 1.04 (0.87; 1.24)                   | 1.05 (0.88; 1.25)                                          |
| LDL cholesterol                                                        |                                                                       |                                               |                                     |                                                            |
| < 1.8                                                                  | 1 (ref)                                                               | 1 (ref)                                       | 1 (ref)                             | 1 (ref)                                                    |
| 1.8 - 2.6                                                              | 0.97 (0.80; 1.16)                                                     | 0.96 (0.80; 1.16)                             | 0.97 (0.81; 1.17)                   | 0.97 (0.81; 1.17)                                          |
| ≥2.6                                                                   | 1.09 (0.91; 1.32)                                                     | 1.10 (0.91; 1.33)                             | 1.10 (0.91; 1.32)                   | 1.10 (0.91; 1.33)                                          |
| HDL cholesterol (M/F)                                                  |                                                                       |                                               |                                     |                                                            |
| < 1.0/1.2                                                              | 1.35 (1.12; 1.62)                                                     | 1.30 (1.07; 1.57)                             | 1.28 (1.06; 1.55)                   | 1.24 (1.03; 1.50)                                          |
| ≥1.0/1.2                                                               | 1 (ref)                                                               | 1 (ref)                                       | 1 (ref)                             | 1 (ref)                                                    |
| Triglycerides                                                          |                                                                       |                                               |                                     |                                                            |
| < 1.7                                                                  | 1 (ref)                                                               | 1 (ref)                                       | 1 (ref)                             | 1 (ref)                                                    |
| ≥1.7                                                                   | 1.36 (1.17; 1.59)                                                     | 1.33 (1.14; 1.55)                             | 1.34 (1.15; 1.56)                   | 1.31 (1.12; 1.53)                                          |
| Lipid-lowering drug use                                                |                                                                       |                                               |                                     |                                                            |
| No                                                                     | 1 (ref)                                                               | 1 (ref)                                       | 1 (ref)                             | 1 (ref)                                                    |
| Yes                                                                    | 0.97 (0.86; 1.11)                                                     | 0.95 (0.84; 1.09)                             | 0.89 (0.76; 1.04)                   | 0.87 (0.74; 1.02)                                          |
| Low-grade inflammation<br>(hsCRP)*, mg/L                               |                                                                       |                                               |                                     |                                                            |
| < 1.0                                                                  | 1 (ref)                                                               | 1 (ref)                                       | 1 (ref)                             | 1 (ref)                                                    |
| 1.0 - 2.9                                                              | 1.12 (0.95; 1.31)                                                     | 1.10 (0.93; 1.29)                             | 1.23 (1.01; 1.50)                   | 1.21 (0.99; 1.48)                                          |
| ≥3.0                                                                   | 1.66 (1.42; 1.94)                                                     | 1.61 (1.37; 1.88)                             | 1.71 (1.41; 2.08)                   | 1.66 (1.37; 2.02)                                          |
| C-peptide                                                              |                                                                       |                                               |                                     |                                                            |
| < 850                                                                  | 1 (ref)                                                               | 1 (ref)                                       | 1 (ref)                             | 1 (ref)                                                    |
| 850 - 1550                                                             | 1.29 (1.08; 1.53)                                                     | 1.25 (1.04; 1.49)                             | 1.20 (0.98; 1.47)                   | 1.16 (0.94; 1.42)                                          |
| ≥1550                                                                  | 1.72 (1.43; 2.07)                                                     | 1.65 (1.36; 2.00)                             | 1.57 (1.27; 1.95)                   | 1.49 (1.19; 1.85)                                          |
| HbA1c, mmol/mol                                                        |                                                                       |                                               |                                     |                                                            |
| < 48                                                                   | 1 (ref)                                                               | 1 (ref)                                       | -                                   | -                                                          |
| 48 - 57                                                                | 1.00 (0.85; 1.19)                                                     | 0.99 (0.84; 1.17)                             | -                                   | -                                                          |
| 58 - 67                                                                | 1.28 (1.01; 1.62)                                                     | 1.24 (0.98; 1.58)                             | -                                   | -                                                          |
| 68 - 77                                                                | 1.61 (1.20; 2.17)                                                     | 1.58 (1.17; 2.13)                             | -                                   | -                                                          |
| ≥78                                                                    | 1.42 (1.06; 1.88)                                                     | 1.35 (1.02; 1.81)                             | -                                   | -                                                          |
| Physical activity, baseline†                                           |                                                                       |                                               |                                     |                                                            |
| 0                                                                      | 1.60 (1.39; 1.85)                                                     | 1.58 (1.37; 1.82)                             | 1.72 (1.44; 2.04)                   | 1.68 (1.41; 2.00)                                          |
| 1 – 2                                                                  | 1.26 (1.09; 1.46)                                                     | 1.25 (1.08; 1.45)                             | 1.24 (1.04; 1.48)                   | 1.22 (1.02; 1.46)                                          |
| ≥3                                                                     | 1 (ref)                                                               | 1 (ref)                                       | 1 (ref)                             | 1 (ref)                                                    |
| Physical activity, change‡                                             |                                                                       |                                               |                                     |                                                            |
| Decreased activity                                                     | 0.97 (0.83; 1.12)                                                     | 0.97 (0.83; 1.12)                             | 0.95 (0.79; 1.13)                   | 0.94 (0.79; 1.13)                                          |
| No change                                                              | 1 (ref)                                                               | 1 (ref)                                       | 1 (ref)                             | 1 (ref)                                                    |
| Increased activity                                                     | 1.05 (0.91; 1.22)                                                     | 1.05 (0.91; 1.22)                             | 0.98 (0.81; 1.17)                   | 0.97 (0.81; 1.16)                                          |
| Smoking, baseline                                                      |                                                                       |                                               |                                     |                                                            |
| Never                                                                  | 1 (ref)                                                               | 1 (ref)                                       | 1 (ref)                             | 1 (ref)                                                    |

|                                  |                   |                   |                   |                   |
|----------------------------------|-------------------|-------------------|-------------------|-------------------|
| Former                           | 1.39 (1.18; 1.64) | 1.38 (1.17; 1.63) | 1.39 (1.18; 1.65) | 1.39 (1.17; 1.64) |
| Current                          | 1.50 (1.24; 1.81) | 1.48 (1.22; 1.79) | 1.51 (1.25; 1.83) | 1.50 (1.23; 1.81) |
| Smoking change§                  |                   |                   |                   |                   |
| Questionnaire 2016: discontinued | 1 (ref)           | 1 (ref)           | 1 (ref)           | 1 (ref)           |
| Questionnaire 2016: continued    | 1.24 (0.80; 1.92) | 1.23 (0.79; 1.90) | 1.27 (0.81; 1.98) | 1.24 (0.80; 1.94) |
| Alcohol (M/F), baseline          |                   |                   |                   |                   |
| ≤21/14                           | 1 (ref)           | 1 (ref)           | 1 (ref)           | 1 (ref)           |
| >21/14                           | 1.19 (0.95; 1.49) | 1.18 (0.94; 1.48) | 1.25 (0.96; 1.63) | 1.25 (0.96; 1.63) |

Abbreviations: aPR; adjusted prevalence ratio, DPN; diabetic polyneuropathy, CI; confidence interval, hsCRP; high-sensitivity C-reactive protein, HbA1c; hemoglobin A1c, M/F; male/female.

\*hsCRP values above 10 mg/L were excluded in order to exclude values reflecting ongoing infections.

†Days per week with minimum 30 minutes of physical activity.

‡Change from baseline to questionnaire 2016 in the number of days per week with minimum 30 minutes of physical activity; Decreased: at least 1 day less per week with more than 30 minutes of physical activity, Increased activity: at least 1 day more per week with minimum 30 minutes of physical activity.

§Among those who were current users at baseline.

||Units of alcohol (male/female), which was the maximum safe amount recommended by the Danish Health Authority, when the DD2 began enrollment.

Supplementary able 12. Prevalence ratios of DPN associated with obesity measures, additionally adjusted for HbA1c

|                                | Main results<br>adjusted for age,<br>sex, and diabetes<br>duration | Additional adjusted<br>for HbA1c |
|--------------------------------|--------------------------------------------------------------------|----------------------------------|
|                                | aPR (95% CI)                                                       | aPR (95% CI)                     |
| BMI at age 20 years            |                                                                    |                                  |
| < 18.5                         | 1.17 (0.92; 1.49)                                                  | 1.23 (0.90; 1.66)                |
| 18.5 - 24                      | 1 (ref)                                                            | 1 (ref)                          |
| 25 - 29                        | 0.89 (0.76; 1.06)                                                  | 0.91 (0.74; 1.12)                |
| 30 - 34                        | 1.32 (1.04; 1.68)                                                  | 1.31 (0.97; 1.76)                |
| ≥35                            | 1.43 (1.05; 1.96)                                                  | 1.43 (0.98; 2.08)                |
| BMI, baseline                  |                                                                    |                                  |
| < 25                           | 1 (ref)                                                            | 1 (ref)                          |
| 25 - 29                        | 1.30 (0.97; 1.75)                                                  | 1.28 (0.95; 1.72)                |
| 30 - 34                        | 1.65 (1.23; 2.20)                                                  | 1.65 (1.23; 2.21)                |
| ≥35                            | 1.88 (1.40; 2.52)                                                  | 1.84 (1.36; 2.47)                |
| BMI, questionnaire date        |                                                                    |                                  |
| < 25                           | 1 (ref)                                                            | 1 (ref)                          |
| 25 - 29                        | 1.39 (1.11; 1.74)                                                  | 1.30 (1.00; 1.70)                |
| 30 - 34                        | 1.78 (1.42; 2.22)                                                  | 1.59 (1.22; 2.08)                |
| ≥35                            | 2.17 (1.72; 2.73)                                                  | 2.16 (1.65; 2.83)                |
| BMI change*, kg/m <sup>2</sup> |                                                                    |                                  |
| < 4                            | 1 (ref)                                                            | 1 (ref)                          |
| 4 - 6                          | 1.27 (1.06; 1.53)                                                  | 1.32 (1.05; 1.66)                |
| 7 - 9                          | 1.24 (1.02; 1.51)                                                  | 1.29 (1.01; 1.64)                |
| ≥10                            | 1.90 (1.61; 2.25)                                                  | 2.03 (1.65; 2.49)                |
| Waist circumference (M/F)      |                                                                    |                                  |
| < 94/80 cm                     | 1 (ref)                                                            | 1 (ref)                          |
| 94-102/80-88 cm                | 1.67 (1.16; 2.41)                                                  | 1.58 (1.02; 2.44)                |
| ≥102/88 cm                     | 2.45 (1.79; 3.40)                                                  | 2.35 (1.60; 3.45)                |
| Waist-hip ratio (M/F)          |                                                                    |                                  |
| < 0.95/0.85                    | 1 (ref)                                                            | 1 (ref)                          |
| 0.95 - 0.99/0.85 - 0.89        | 1.27 (1.01; 1.59)                                                  | 1.17 (0.89; 1.53)                |
| 1.00 - 1.04/0.90 - 0.94        | 1.55 (1.26; 1.91)                                                  | 1.40 (1.09; 1.79)                |
| ≥1.05/0.95                     | 1.67 (1.36; 2.05)                                                  | 1.53 (1.20; 1.95)                |
| Waist-height ratio             |                                                                    |                                  |
| < 0.5                          | 1 (ref)                                                            | 1 (ref)                          |
| 0.5 - 0.6                      | 1.51 (1.04; 2.17)                                                  | 1.28 (0.86; 1.92)                |
| ≥0.6                           | 2.20 (1.55; 3.17)                                                  | 1.90 (1.29; 2.80)                |

Abbreviations: DPN; diabetic polyneuropathy, MNSIq; Michigan Neuropathy Screening Instrument questionnaire, DN4; Douleur Neuropathique en 4 questions, aPR; adjusted prevalence ratio, CI; confidence interval BMI; body mass index.

All analyses are adjusted for age, sex, and diabetes duration

\*BMI change from age 20 years to questionnaire 2016.

**Figures:**

Supplementary Figure 1: Flowchart

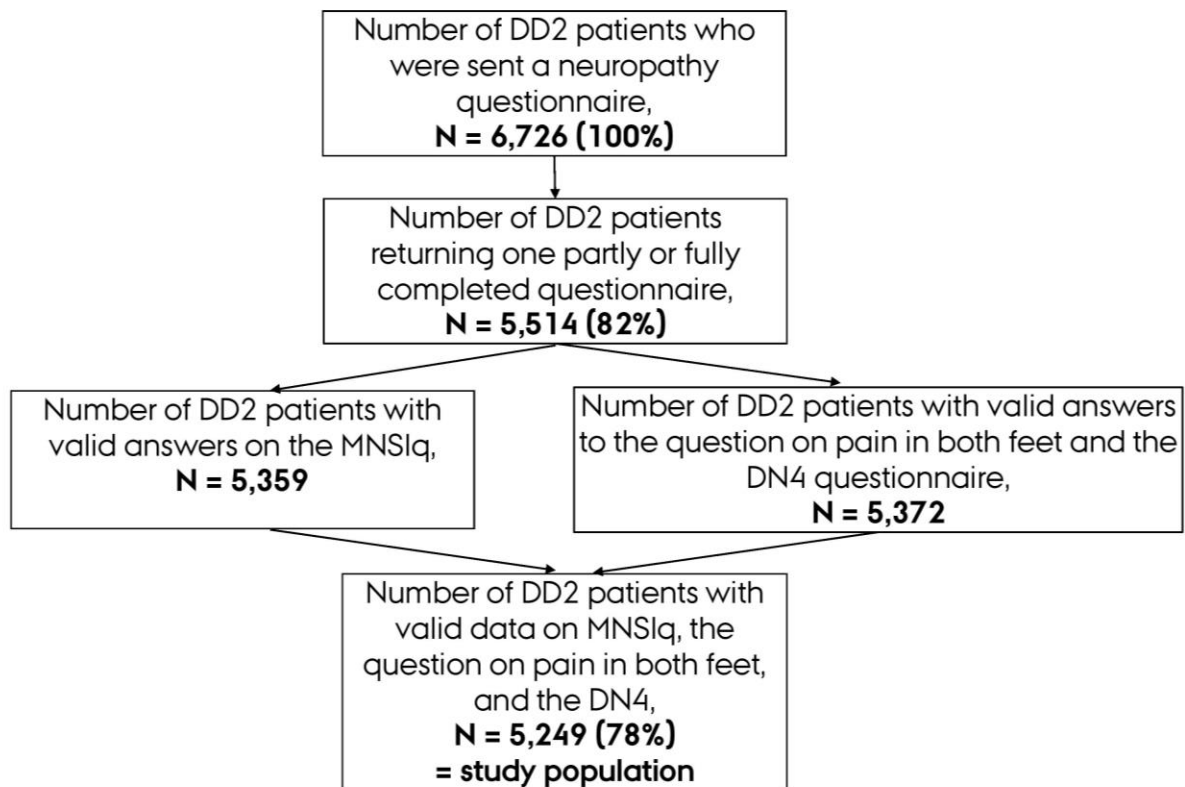

Supplementary Figure 2: Schematic overview of the definition of DPN and the division into non-painful DPN and painful DPN in A) main analyses and B) sensitivity analyses.

A)

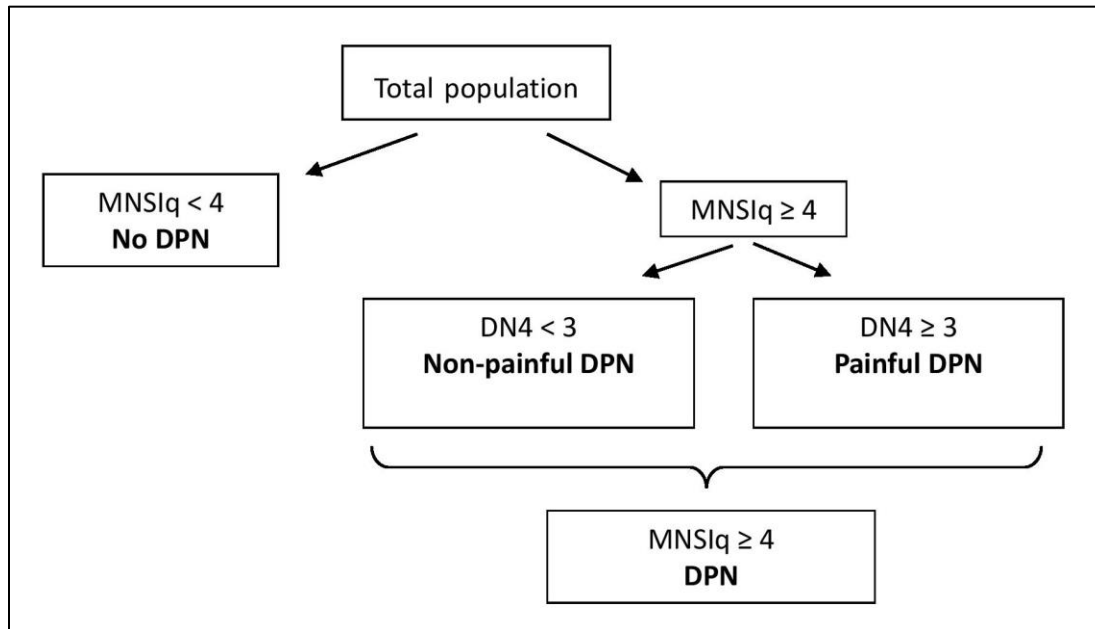

B)

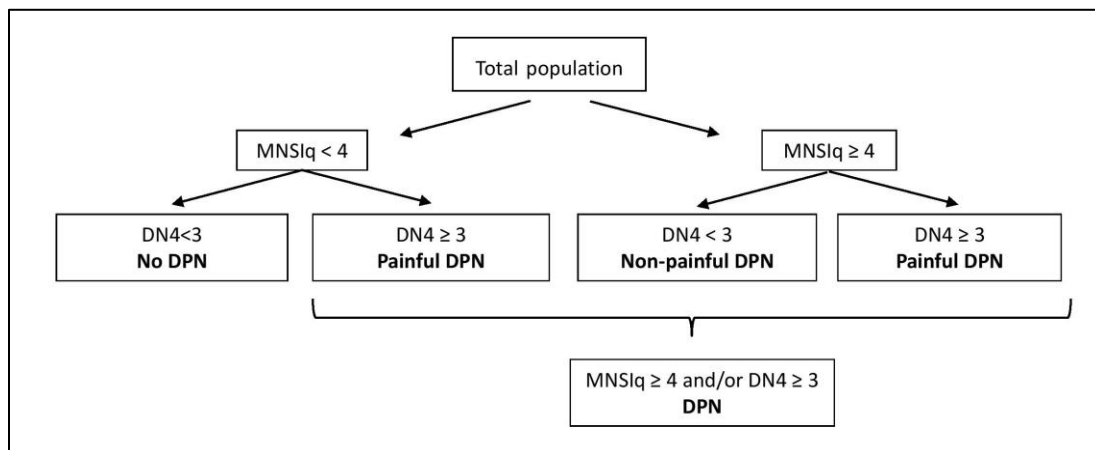

Of note, the DN4 score related specifically to pain in both feet and the DN4 questionnaire was only to be filled if pain in the feet was present. Thus, DN4 <3 means either no pain in feet or pain in both feet but DN4 <3.

Supplementary Figure 3: Restricted cubic spline regression of DPN for central and general obesity measures.

Panel A: BMI, 20 years

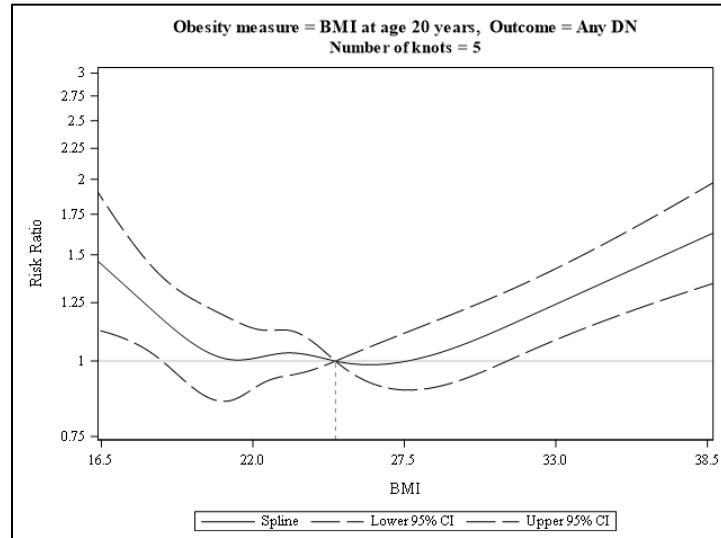

Panel B: BMI, baseline

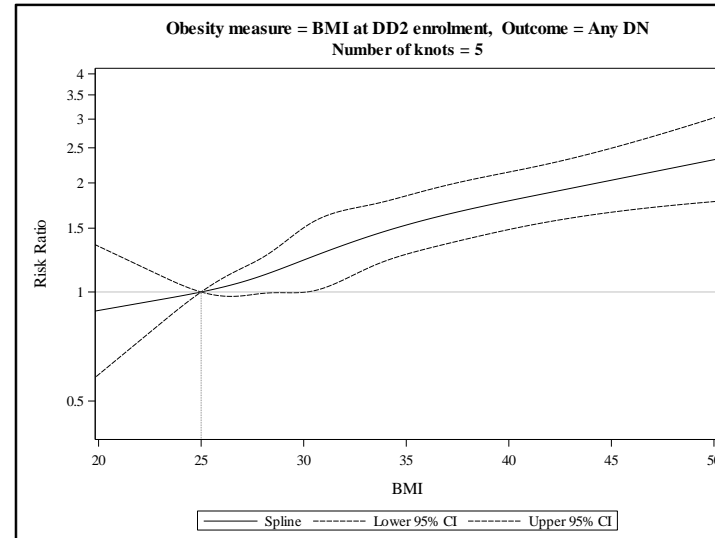

Panel C: BMI, questionnaire date

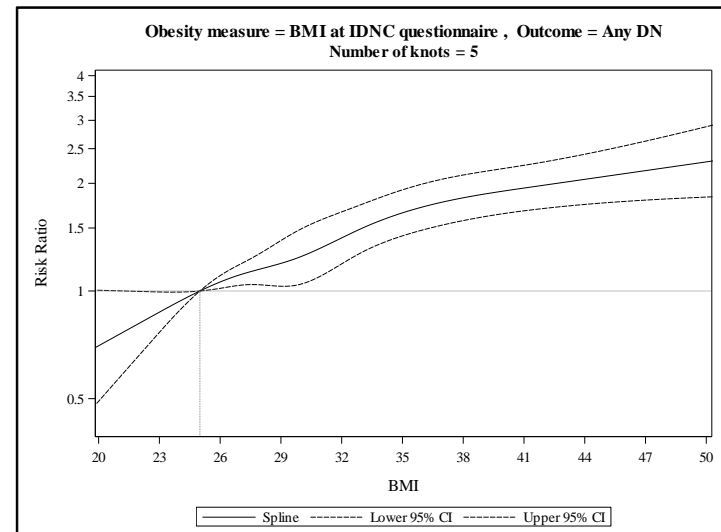

Panel D: BMI change (baseline -> questionnaire)

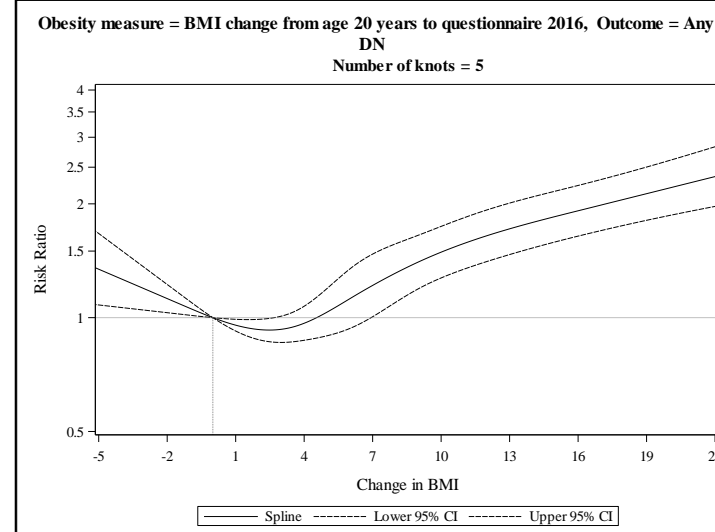



Panel E: Waist circumference, female

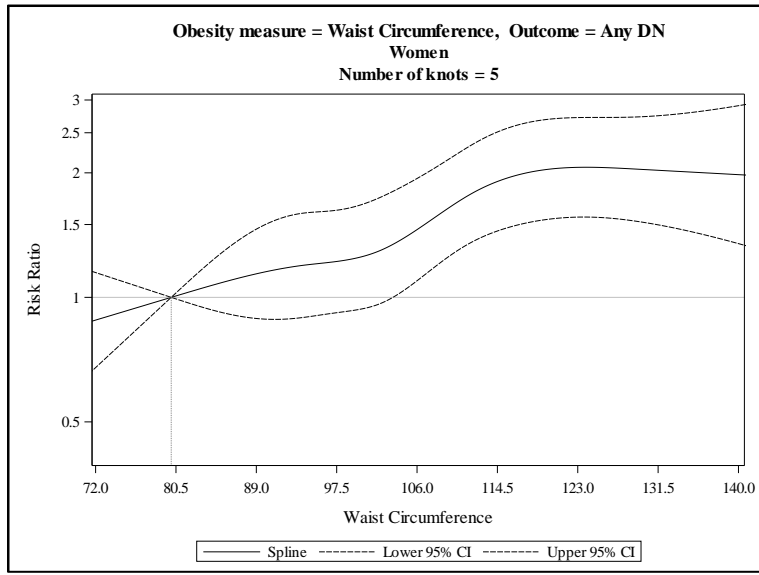

Panel F: Waist circumference, male

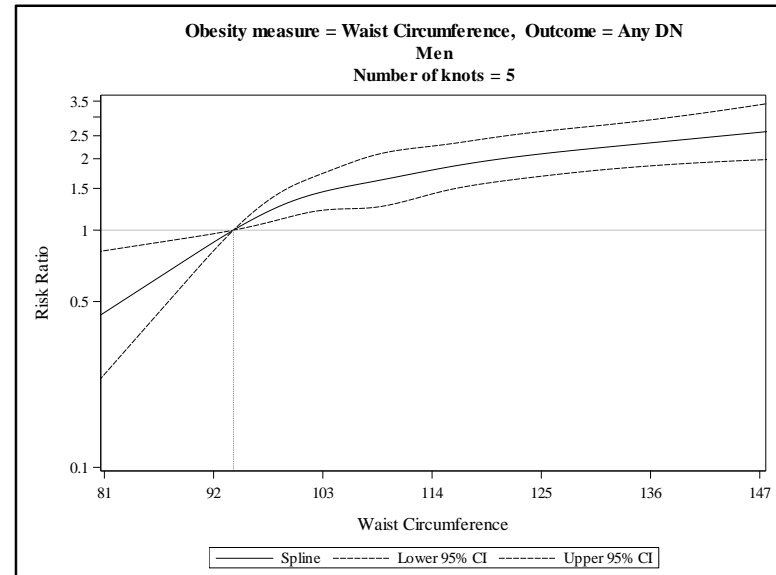

Panel G: Waist-hip ratio, female

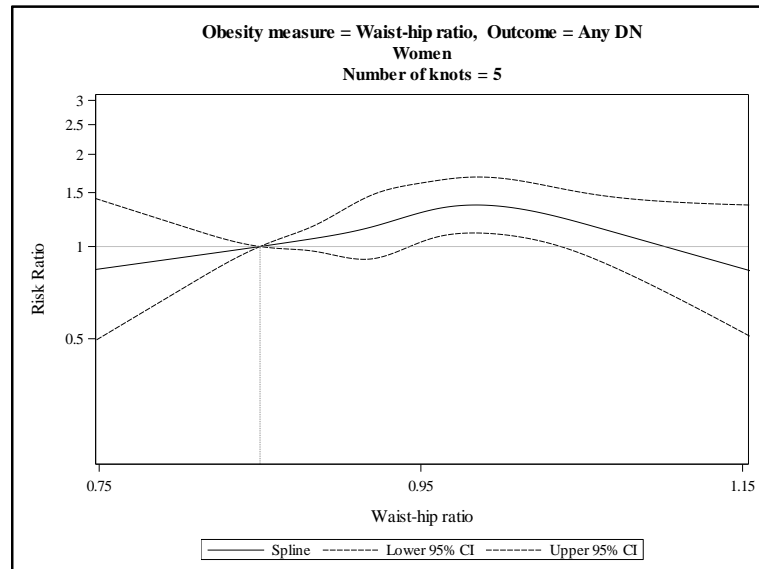

Panel H: waist-hip ratio, male

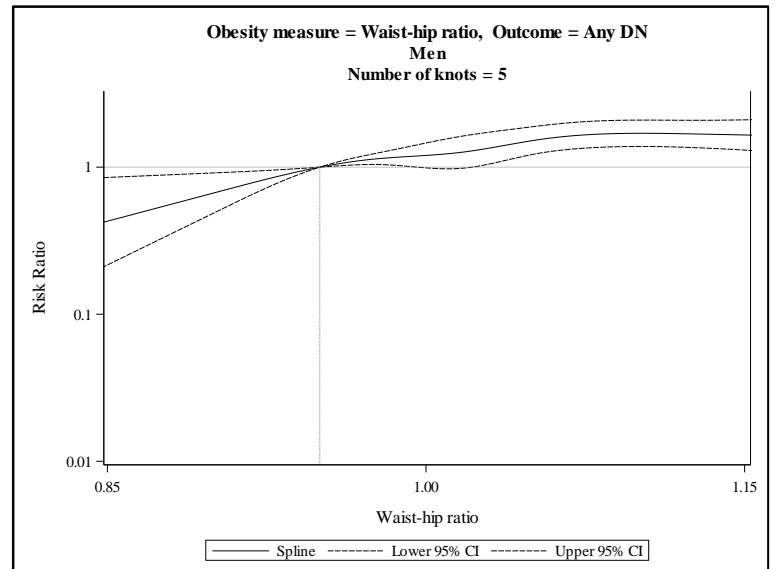

Panel I: waist-heigth ratio, female

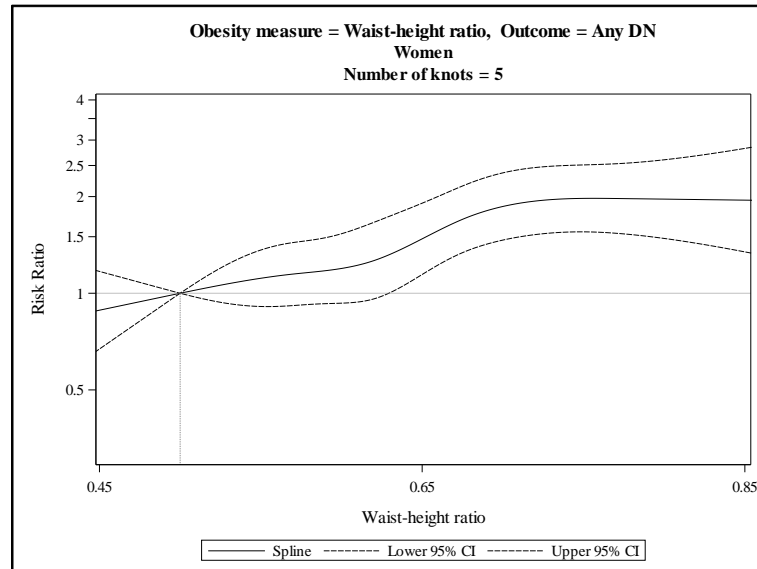

Panel J: Waist-heigth ratio ratio, male

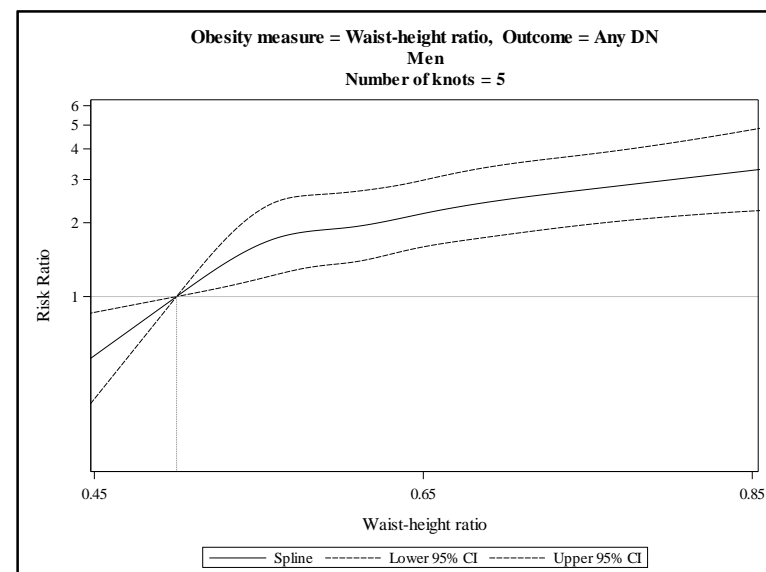

Supplementary Figure 4: Prevalence ratios of DPN for different obesity measures, without and with additional adjustment for BMI.

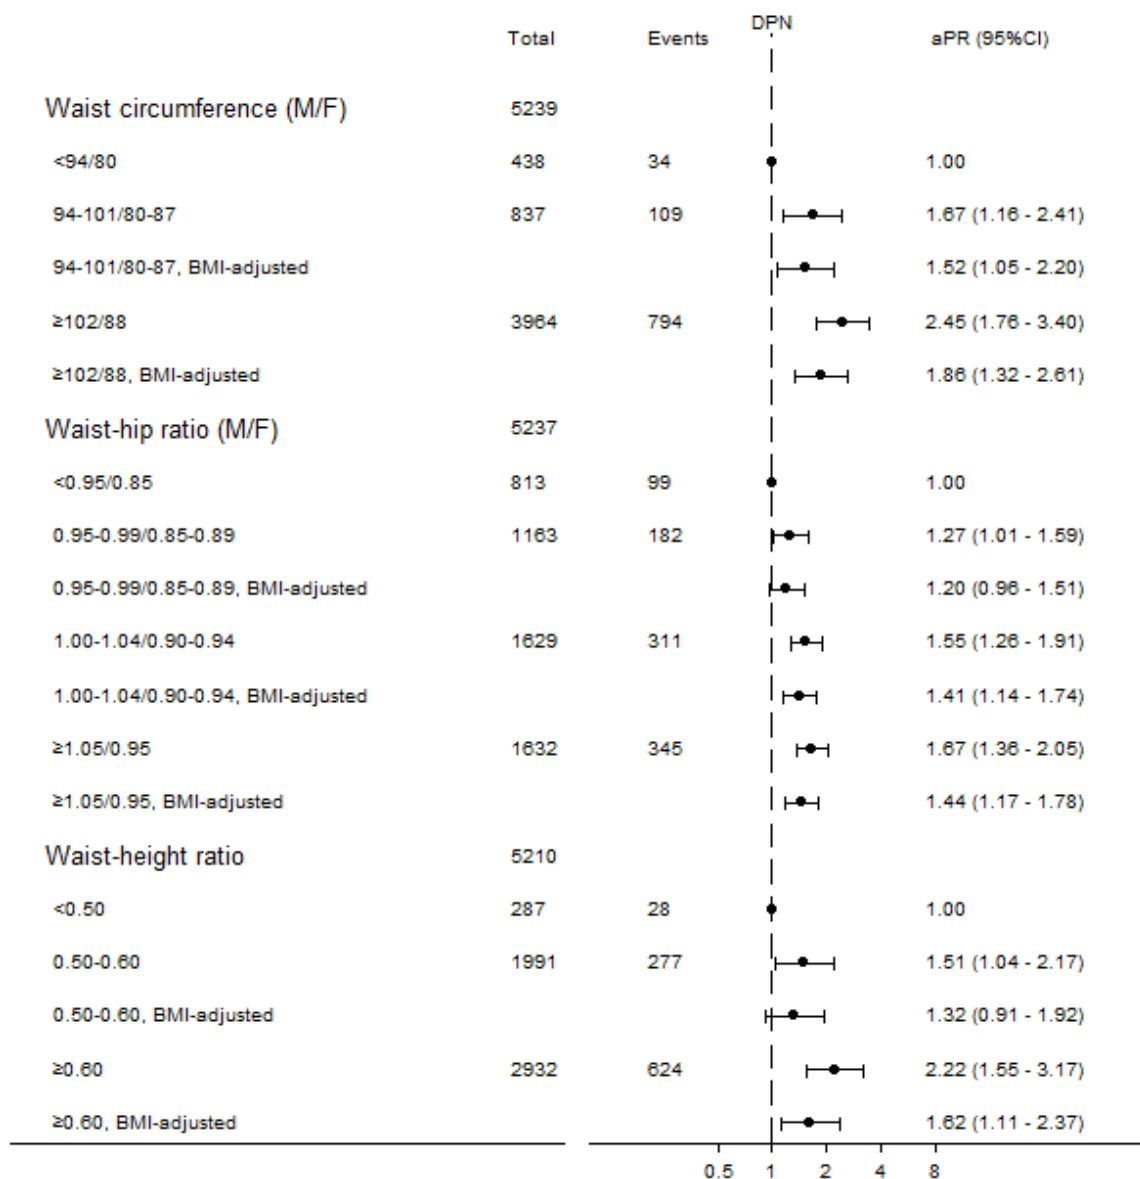

Abbreviations: aPR; adjusted prevalence ratio, DPN; diabetic polyneuropathy, CI; confidence interval; BMI; body mass index.

Of note: BMI from questionnaire 2016 is used for adjustment because this BMI measure is available for N=5159, whereas BMI at baseline = DD2 enrollment is available only for N=3263. Only a minor difference in BMI was observed between these two time points (median change: - 0.4 kg/m [IQR: -1.6; 0.6]) and central obesity measures were also associated with DPN independent of BMI if adjusted for BMI at baseline instead of BMI at questionnaire. All estimates are adjusted for age, sex, and diabetes duration.
